# Supplementary material for: Conservation of a Chromosome 8 Inversion and Exon Mutations Confirm Common Gulonolactone Oxidase Gene Evolution Among Primates, Including H. Neanderthalensis
Source: PubMed Central journal article supplement (PMC11169010; doi:10.1007/s00239-024-10165-0), 2024-04-29
Supplement: 239_2024_10165_MOESM1_ESM.pdf [file 239_2024_10165_MOESM1_ESM.pdf]

| Species Name           | Common Name        | Order   | Sequence Acquired                                     | Reciprocal BLAST Performed<br>(Yes, Software, Subject) | Reciprocal BLAST<br>Acquired | GULO<br>Transcript<br>Number | Transcript Name      | Chromosome/scaffold | Genomic Length of GULO | GULO<br>Functional | GULO<br>Orientation | GULO/CLU<br>Co-<br>Occurrence | Clusterin<br>Orientation |
|------------------------|--------------------|---------|-------------------------------------------------------|--------------------------------------------------------|------------------------------|------------------------------|----------------------|---------------------|------------------------|--------------------|---------------------|-------------------------------|--------------------------|
| Microcebus murinus     | Mouse Lemur        | Primate | Ensembl 107                                           | No                                                     | NA                           | 1                            | ENSMICT00000053941.2 | Chromosome 20       | 17,188,391-17,206,499  | Yes                | Reverse             | Yes                           | Forward                  |
| Otolemur garnettii     | Garnett's Galago   | Primate | Ensembl 107                                           | No                                                     | NA                           | 1                            | ENSOGAT00000025787.1 | Scaffold GL873593.1 | 3,059,738-3,080,850    | Yes                | Reverse             | Yes                           | Forward                  |
| Propithecus coquereli  | Coquerel's Sifaka  | Primate | Ensembl 107                                           | No                                                     | NA                           | 1                            | ENSPCOT00000027847.1 | Scaffold KQ028065.1 | 8,255,372-8,271,581    | Yes                | Forward             | Yes                           | Reverse                  |
| Mus musculus           | Mouse (CS7Bl/6J)   | Rodent  | Ensembl 107                                           | No                                                     | NA                           | 1                            | ENSMUST00000059970.9 | Chromosome 14       | 66,224,235-66,246,656  | Yes                | Reverse             | Yes                           | Forward                  |
| Papio anubis           | Olive Baboon       | Primate | Ensembl 107                                           | Yes, Ensembl 107, Human                                | Yes                          | 0                            | NA                   | Chromosome 8        | 25,616,326-25,644,036  | No                 | Forward             | Yes                           | Reverse                  |
| Mandrillus leucophaeus | Drill              | Primate | Ensembl 107                                           | Yes, Ensembl 107, Human                                | Yes                          | 0                            | NA                   | Scaffold KN974716.1 | 1,963,251-1,991,376    | No                 | Forward             | Yes                           | Reverse                  |
| Macaque mullata        | Rhesus Macaque     | Primate | Ensembl 107                                           | Yes, Ensembl 107, Human                                | Yes                          | 0                            | NA                   | Chromosome 8        | 27,825,501-27,852,698  | No                 | Forward             | Yes                           | Reverse                  |
| Pongo abelii           | Sumatran Orangutan | Primate | Ensembl 107                                           | Yes, Ensembl 107, Human                                | Yes                          | 0                            | NA                   | Chromosome 8        | 26,519,211-26,548,307  | No                 | Forward             | Yes                           | Reverse                  |
| Pan troglodytes        | Chimpanzee         | Primate | Ensembl 107                                           | Yes, Ensembl 107, Human                                | Yes                          | 0                            | NA                   | Chromosome 8        | 27,014,181-27,043,083  | No                 | Forward             | Yes                           | Reverse                  |
| Pan paniscus           | Bonobo             | Primate | Ensembl 107                                           | Yes, Ensembl 107, Human                                | Yes                          | 0                            | NA                   | Chromosome 8        | 24,032,905-24,061,122  | No                 | Forward             | Yes                           | Reverse                  |
| Gorilla gorilla        | Gorilla            | Primate | Ensembl 107                                           | Yes, Ensembl 107, Human                                | Yes                          | 0                            | NA                   | Chromosome 8        | 26,656,774-26,685,728  | No                 | Forward             | Yes                           | Reverse                  |
| Homo sapiens           | Human              | Primate | Ensembl 107                                           | No                                                     | NA                           | 0                            | NA                   | Chromosome 8        | 27,560,272-27,560,378  | No                 | Forward             | Yes                           | Reverse                  |
| Homo neanderthalensis  | Neandertal         | Primate | Max Planck Institute for<br>Evolutionary Anthropology | Yes, Ensembl 107, Human                                | Yes                          | 0                            | NA                   | Chromosome 8        |                        | No                 | Forward             | Yes                           | Reverse                  |
