# Supplementary material for: Conservation of a Chromosome 8 Inversion and Exon Mutations Confirm Common Gulonolactone Oxidase Gene Evolution Among Primates, Including H. Neanderthalensis
Source: PubMed Central journal article supplement (PMC11169010; doi:10.1007/s00239-024-10165-0), 2024-04-29
Supplement: 239_2024_10165_MOESM2_ESM.pdf [file 239_2024_10165_MOESM2_ESM.pdf]

| Species Name                      | Common Name           | Order        | Family         | Sequence Acquired | Reciprocal BLAST Performed (Yes, Software) | Reciprocal BLAST Acquired | GULO Transcript Number | Transcript Name        | Chromosome / Scaffold          | Genomic Length of GULO        | GULO Functional | GULO Orientation | GULO/CLU Co-Occurrence | Clusterin Orientation | Notes                                                                                                                                                                                           |
|-----------------------------------|-----------------------|--------------|----------------|-------------------|--------------------------------------------|---------------------------|------------------------|------------------------|--------------------------------|-------------------------------|-----------------|------------------|------------------------|-----------------------|-------------------------------------------------------------------------------------------------------------------------------------------------------------------------------------------------|
| <i>Bos taurus</i>                 | Cow                   | Artiodactyla | Bovidae        | Ensembl 107       | No                                         | NA                        | 1                      |                        | Primary Assembly 8             | 74,669,366<br>74,693,887      | Yes             | Forward          | Yes                    | Reverse               |                                                                                                                                                                                                 |
| <i>Capra hircus</i>               | Goat                  | Artiodactyla | Bovidae        | Ensembl 107       | No                                         | NA                        | 1                      |                        | Chromosome 8                   | 74,467,306<br>74,499,882      | Yes             | Forward          | Yes                    | Reverse               | Clusterin is located after three short ORFs                                                                                                                                                     |
| <i>Ovis aries</i>                 | Sheep (ewe)           | Artiodactyla | Bovidae        | Ensembl 107       | No                                         | NA                        | 1                      | ENSGART00000010494.1   | Chromosome 2                   | 37,997,301<br>38,020,786      | Yes             | Reverse          | Yes                    | Forward               | Two small genes between GULO and CLU                                                                                                                                                            |
| <i>Delphinapterus leucas</i>      | Beluga Whale          | Artiodactyla | Monodontidae   | Ensembl 107       | No                                         | NA                        | 1                      | ENSELEF000000019301.1  | Primary assembly<br>MLT02014.1 | 10,876,042<br>10,905,071      | Yes             | Reverse          | Yes                    | Forward               |                                                                                                                                                                                                 |
| <i>Monodon monoceros</i>          | Narwhale              | Artiodactyla | Monodontidae   | Ensembl 107       | No                                         | NA                        | 1                      | ENSMNNT0000015036348.1 | Primary assembly<br>SHG0100696 | 10,781,157<br>10,824,904      | Yes             | Reverse          | Yes                    | Forward               |                                                                                                                                                                                                 |
| <i>Phocoena sinu</i>              | Vaquita               | Artiodactyla | Phocoenidae    | Ensembl 107       | No                                         | NA                        | 1                      | ENSPNT000000018163.1   | Primary assembly 6             | 104,876.72<br>104,906.48<br>3 | Yes             | Forward          | Yes                    | Reverse               |                                                                                                                                                                                                 |
| <i>Sus scrofa</i>                 | Pig (Reference)       | Artiodactyla | Suidae         | Ensembl 107       | No                                         | NA                        | 2                      | ENSSCT000000010600.5   | Primary assembly 14            | 11,300,045<br>11,336,139      | Yes             | Forward          | Yes                    | Reverse               |                                                                                                                                                                                                 |
| <i>Canis lupus familiaris</i>     | Dog (German Shepherd) | Carnivore    | Canidae        | Ensembl 107       | No                                         | NA                        | 2                      |                        | Primary Assembly 25            | 30,175,908<br>30,207,796      | Yes             | Reverse          | Yes                    | Forward               |                                                                                                                                                                                                 |
| <i>Vulpes vulpes</i>              | Fox                   | Carnivore    | Canidae        | Ensembl 107       | No                                         | NA                        | 1                      | ENSVUT000000006063.1   | Primary assembly<br>NBD0010000 | 4,633,631<br>4,665,823        | Yes             | Reverse          | Yes                    | Forward               |                                                                                                                                                                                                 |
| <i>Felis catus</i>                | Cat                   | Carnivore    | Felidae        | Ensembl 107       | No                                         | NA                        | 1                      | ENSCAT0000000028823.4  | Chromosome B1                  | 51,029,967<br>51,062,748      | Yes             | Forward          | Yes                    | Reverse               |                                                                                                                                                                                                 |
| <i>Lynx canadensis</i>            | Canadian Lynx         | Carnivore    | Felidae        | Ensembl 107       | No                                         | NA                        | 1                      | ENSLCNT000000009362.1  | Primary assembly B1            | 48,944,439<br>48,978,740      | Yes             | Forward          | Yes                    | Reverse               |                                                                                                                                                                                                 |
| <i>Zalophus californianus</i>     | California Sea Lion   | Carnivore    | Otariidae      | Ensembl 107       | No                                         | NA                        | 1                      | ENSCZAT000150183.1     | Primary assembly 2             | 153,632,000<br>153,663,133    | Yes             | Reverse          | Yes                    | Forward               |                                                                                                                                                                                                 |
| <i>Hipposideros armiger</i>       | Great Roundleaf bat   | Chiroptera   | Hipposideridae | NCBI              | No                                         | NA                        | 1                      |                        | Unplaced Chromosome            | 363,791<br>417,651            | Yes             | Forward          | Yes                    | Reverse               |                                                                                                                                                                                                 |
| <i>Rousettus leichenaullii</i>    | Rousette              | Chiroptera   | Pteropodidae   | NCBI              | No                                         | NA                        | 1                      | HQ415789.1             | NA                             | NA                            | Yes             | NA               | NA                     | NA                    | Only an mRNA transcript is known                                                                                                                                                                |
| <i>Rhinolophus ferrumequinum</i>  | Greater Horseshoe bat | Chiroptera   | Rhinolophidae  | Ensembl 107       | No                                         | NA                        | 6                      |                        | Primary Assembly 18            | 28,724,109<br>28,823,897      | No              | Forward          | Yes                    | Reverse               | Chose exons from <i>Hipposideros armiger</i> BLAST against greater horseshoe bat which aligned to the transcript ID of ENSRNO0010021794.1. Did not include additional exons of this transcript. |
| <i>Oryctolagus cuniculus</i>      | Rabbit                | Lagomorph    | Leporidae      | Ensembl 107       | No                                         | NA                        | 2                      | ENSOCUT000000027132.3  | Chromosome 2                   | 42,085,515<br>42,110,122      | Yes             | Reverse          | Yes                    | Forward               |                                                                                                                                                                                                 |
| <i>Ochotona princeps</i>          | Pika                  | Lagomorph    | Ochotonidae    | Ensembl 107       | Yes, NCBI, Oryctolagus cuniculus           | Yes                       | 0                      | NA                     | Gene Scaffold                  | 320,944<br>329,721            | Unlikely        | Forward          | Yes                    | Reverse               | Chose sequences from reciprocal BLAST search to <i>Oryctolagus cuniculus</i> . Used NCBI fro reciprocal BLAST for relaxed alignment options                                                     |
| <i>Monodelphis domestica</i>      | Opussum               | Marsupial    | Didelphidae    | Ensembl 107       | No                                         | NA                        | 1                      | ENSMODT000000300272.4  | Primary assembly 1             | 504,174.88<br>504,231.04<br>3 | Yes             | Reverse          | Yes                    | Forward               |                                                                                                                                                                                                 |
| <i>Microcebus murinus</i>         | Mouse Lemur           | Primate      | Cheirogaleidae | Ensembl 107       | No                                         | NA                        | 1                      | ENSMICT000000013941.2  | Chromosome 20                  | 17,188,391<br>17,206,499      | Yes             | Reverse          | Yes                    | Forward               |                                                                                                                                                                                                 |
| <i>Otolemur garnettii</i>         | Garnett's Galago      | Primate      | Galagidae      | Ensembl 107       | No                                         | NA                        | 1                      | ENSGOAT000000025787.1  | Scaffold                       | 3,059,738<br>3,080,850        | Yes             | Reverse          | Yes                    | Forward               |                                                                                                                                                                                                 |
| <i>Proprhynchus coquereli</i>     | Coquerel's Sifaka     | Primate      | Indridae       | Ensembl 107       | No                                         | NA                        | 1                      | ENSPICD000000017847.1  | Scaffold                       | 8,255,172<br>8,271,581        | Yes             | Forward          | Yes                    | Reverse               |                                                                                                                                                                                                 |
| <i>Cavia aerea</i>                | Brazilian Guinea Pig  | Rodent       | Caviidae       | Ensembl 107       | No                                         | NA                        | 1                      | ENSCAPT000000007155.1  | AUP2010001                     | 63,458,181<br>63,472,619      | Likely          | Forward          | Yes                    | Reverse               |                                                                                                                                                                                                 |
| <i>Cavia porcellus</i>            | Domestic Guinea Pig   | Rodent       | Caviidae       | Ensembl 107       | Yes, Ensembl, Cavia aerea                  | Yes                       | 0                      | NA                     | D5562856.1                     | 63,493,696<br>63,506,078      | No              | Forward          | Yes                    | Reverse               | Recovered exons from <i>Cavia aerea</i> GULO transcript                                                                                                                                         |
| <i>Chinchilla lanigera</i>        | Chinchilla            | Rodent       | Chinchillidae  | Ensembl 107       | No                                         | NA                        | 2                      | ENSCLAT000000021123.1  | Scaffold                       | 50,132,179<br>50,154,632      | Yes             | Forward          | Yes                    | Reverse               |                                                                                                                                                                                                 |
| <i>Mesocricetus auratus</i>       | Golden Hamster        | Rodent       | Cricetidae     | Ensembl 107       | No                                         | NA                        | 1                      | ENSMAUT0000001017046.1 | Scaffold                       | 2,434,830<br>2,454,258        | Yes             | Forward          | Yes                    | Reverse               |                                                                                                                                                                                                 |
| <i>Meriones unguiculatus</i>      | Mongolian Gerbil      | Rodent       | Muridae        | Ensembl 107       | No                                         | NA                        | 2                      | ENSMUJGT000000031480.1 | Primary assembly<br>NHT0100003 | 1,397,210<br>1,415,754        | Yes             | Reverse          | Yes                    | Forward               |                                                                                                                                                                                                 |
| <i>Mus musculus</i>               | Mouse (C57Bl/6)       | Rodent       | Muridae        | Ensembl 107       | No                                         | NA                        | 1                      | ENSMUST000000059970.9  | Chromosome 14                  | 66,224,235<br>66,246,656      | Yes             | Reverse          | Yes                    | Forward               |                                                                                                                                                                                                 |
| <i>Rattus norvegicus</i>          | Rat                   | Rodent       | Muridae        | Ensembl 107       | No                                         | NA                        | 1                      | ENSRNTO000000012702.7  | Primary assembly 15            | 40,205,665<br>40,227,874      | Yes             | Reverse          | Yes                    | Forward               |                                                                                                                                                                                                 |
| <i>Ictidomys tridecemlineatus</i> | Striped Gopher        | Rodent       | Sciuridae      | Ensembl 107       | No                                         | NA                        | 1                      |                        | Scaffold                       | 470,978<br>492,441            | Yes             | Forward          | Yes                    | Reverse               |                                                                                                                                                                                                 |
