# Supplementary material for: Conservation of a Chromosome 8 Inversion and Exon Mutations Confirm Common Gulonolactone Oxidase Gene Evolution Among Primates, Including H. Neanderthalensis
Source: PubMed Central journal article supplement (PMC11169010; doi:10.1007/s00239-024-10165-0), 2024-04-29
Supplement: 239_2024_10165_MOESM3_ESM.pdf [file 239_2024_10165_MOESM3_ESM.pdf]

| Species Name               | Common Name                  | Order        | Family         | Sequence Acquired | Reciprocal BLAST Performed (Yes, Software, Subject) | Reciprocal BLAST Acquired | GULO Transcript Number | Transcript Name              | Chromosome/s scaffold                 | Genomic Length of GULO  | GULO Functional | GULO Orientation | GULO/CLU Co-Occurrence | Cluster Orientation                                                                                                                                                                        | Notes                                                                                                                               |
|----------------------------|------------------------------|--------------|----------------|-------------------|-----------------------------------------------------|---------------------------|------------------------|------------------------------|---------------------------------------|-------------------------|-----------------|------------------|------------------------|--------------------------------------------------------------------------------------------------------------------------------------------------------------------------------------------|-------------------------------------------------------------------------------------------------------------------------------------|
| Bos taurus                 | Cow                          | Artiodactyla | Bovidae        | Ensembl 107       | No                                                  | NA                        | 1                      | Primary Assembly 8           | 74,669,366-74,693,897                 | Yes                     | Forward         | Yes              | Reverse                |                                                                                                                                                                                            |                                                                                                                                     |
| Ovis aries                 | Sheep (texel)                | Artiodactyla | Bovidae        | Ensembl 107       | No                                                  | NA                        | 1                      | ENSOART000100010494.1        | Chromosome 2<br>37,997,301-38,020,786 | Yes                     | Reverse         | Yes              | Forward                | Two small genes between GULO and CLU                                                                                                                                                       |                                                                                                                                     |
| Delphinapterus leucas      | Beluga Whale                 | Artiodactyla | Monodontidae   | Ensembl 107       | No                                                  | NA                        | 1                      | ENSDLET000100001301.1        | Primary assembly ML702014.1           | 10,876,042-10,905,071   | Yes             | Reverse          | Yes                    | Forward                                                                                                                                                                                    |                                                                                                                                     |
| Monodon monoceros          | Narwhale                     | Artiodactyla | Monodontidae   | Ensembl 107       | No                                                  | NA                        | 1                      | ENSMMNTO0015026348.1         | Primary assembly SHG01006968.1        | 10,781,157-10,814,904   | Yes             | Reverse          | Yes                    | Forward                                                                                                                                                                                    |                                                                                                                                     |
| Phocoena sinus             | Vaquita                      | Artiodactyla | Phocoenidae    | Ensembl 107       | No                                                  | NA                        | 1                      | ENSPNT000100018163.1         | Primary assembly 6                    | 104,876,722-104,906,483 | Yes             | Forward          | Yes                    | Reverse                                                                                                                                                                                    |                                                                                                                                     |
| Sus scrofa                 | Pig (Reference)              | Artiodactyla | Suidae         | Ensembl 107       | No                                                  | NA                        | 2                      | ENSSCT000100010600.5         | Primary assembly 14                   | 11,300,045-11,336,139   | Yes             | Forward          | Yes                    | Reverse                                                                                                                                                                                    |                                                                                                                                     |
| Canis lupus familiaris     | Dog (German Shepherd)        | Carnivore    | Canidae        | Ensembl 107       | No                                                  | NA                        | 2                      | Primary Assembly 25          | 30,175,908-30,207,796                 | Yes                     | Reverse         | Yes              | Forward                |                                                                                                                                                                                            |                                                                                                                                     |
| Vulpes vulpes              | Fox                          | Carnivore    | Canidae        | Ensembl 107       | No                                                  | NA                        | 1                      | ENSVVUT000100006063.1        | Primary_assembly NBDQ01000068.1       | 4,633,631-4,665,823     | Yes             | Reverse          | Yes                    | Forward                                                                                                                                                                                    |                                                                                                                                     |
| Felis catus                | Cat                          | Carnivore    | Felidae        | Ensembl 107       | No                                                  | NA                        | 1                      | ENSFCA000100028823.4         | Chromosome 81                         | 51,029,967-51,062,748   | Yes             | Forward          | Yes                    | Reverse                                                                                                                                                                                    |                                                                                                                                     |
| Lynx canadensis            | Canadian Lynx                | Carnivore    | Felidae        | Ensembl 107       | No                                                  | NA                        | 1                      | ENSLCNT000105009362.1        | Primary assembly B1                   | 48,944,439-48,978,740   | Yes             | Forward          | Yes                    | Reverse                                                                                                                                                                                    |                                                                                                                                     |
| Zalophus californianus     | California Sea Lion          | Carnivore    | Otariidae      | Ensembl 107       | No                                                  | NA                        | 1                      | ENSCA000115003183.1          | Primary assembly 2                    | 153,632,000-153,663,132 | Yes             | Reverse          | Yes                    | Forward                                                                                                                                                                                    |                                                                                                                                     |
| Hipposideros armiger       | Great Roundleaf Bat          | Chiroptera   | Hipposideridae | NCBI              | No                                                  | NA                        | 1                      | Unplaced Chromosome          | 363,791-417,651                       | Yes                     | Forward         | Yes              | Reverse                |                                                                                                                                                                                            |                                                                                                                                     |
| Molossus molossus          | Pallas's mastiff bat         | Chiroptera   | Molossidae     | NCBI              | No                                                  | NA                        | 0                      | NA                           | GCF_014108415.1                       | 82,558,666-82,590,582   | No              | Forward          | Yes                    | Reverse                                                                                                                                                                                    | Only 10 exons are present                                                                                                           |
| Pteropus alecto            | black flying fox             | Chiroptera   | Pteropodidae   | NCBI              | No                                                  | NA                        | 1                      | XM_0156001680.1              | GCF_000325575.1                       | 5,113,284-5,138,269     | No              | Reverse          | Yes                    | Forward                                                                                                                                                                                    | Encodes a protein of 286 AA                                                                                                         |
| Pteropus giganteus         | Indian flying fox            | Chiroptera   | Pteropodidae   | NCBI              | No                                                  | NA                        | 1                      | XM_0398751768.1              | GCA_002729225.1                       | 4,827,677-4,849,252     | No              | Reverse          | Yes                    | Forward                                                                                                                                                                                    | Encodes a protein of 647 AA                                                                                                         |
| Rousettus aegyptiacus      | Egyptian rousette            | Chiroptera   | Pteropodidae   | NCBI              | No                                                  | NA                        | 1                      | XM_016144624.2               | NW_023416291.1                        | 20,184,295-20,204,016   | Yes             | Forward          | Yes                    | Reverse                                                                                                                                                                                    | 12 SNPs occur between the Egyptian and Leschault's rousette species                                                                 |
| Rhinolophus ferrumequinum  | Greater Horseshoe Bat        | Chiroptera   | Rhinolophidae  | Ensembl 107       | No                                                  | NA                        | 6                      | Primary Assembly 18          | 28,724,109-28,833,897                 | No                      | Forward         | Yes              | Reverse                | Chose exons from hipposideros armiger BLAST against greater horseshoe bat which aligned to the transcript ID of ENSRFET00010021794.1. Did not include additional exons of this transcript. |                                                                                                                                     |
| Rhinolophus sinicus        | Chinese rufous horseshoe bat | Chiroptera   | Rhinolophidae  | NCBI              | No                                                  | NA                        | 1                      | XM_0197331088.1              | GCF_001888835.1                       | 6,599,375-6,630,440     | No              | Reverse          | Yes                    | Forward                                                                                                                                                                                    | There are three different genes in the NCBI database. All are on the reverse strand. Selected the transcript adjacent to Clu        |
| Oryctolagus cuniculus      | Rabbit                       | Lagomorph    | Leporidae      | Ensembl 107       | No                                                  | NA                        | 2                      | ENSOCT000100027132.3         | Chromosome 2                          | 42,085,515-42,110,122   | Yes             | Reverse          | Yes                    | Forward                                                                                                                                                                                    |                                                                                                                                     |
| Ochotona princeps          | Pika                         | Lagomorph    | Ochotonidae    | Ensembl 107       | Yes, NCBI, Oryctolagus cuniculus                    | Yes                       | 0                      | NA                           | Gene Scaffold 936                     | 320,944-339,721         | Unlikely        | Forward          | Yes                    | Reverse                                                                                                                                                                                    | Chose sequences from reciprocal BLAST search to Oryctolagus cuniculus. Used NCBI fro reciprocal BLAST for relaxed alignment options |
| Monodelphis domestica      | Opussum                      | Marsupial    | Didelphidae    | Ensembl 107       | No                                                  | NA                        | 1                      | ENSMODT00000020272.1         | Primary_assembly 1                    | 504,174,883-504,231,043 | Yes             | Reverse          | Yes                    | Forward                                                                                                                                                                                    |                                                                                                                                     |
| Microcebus murinus         | Mouse Lemur                  | Primate      | Cheirogalidae  | Ensembl 107       | No                                                  | NA                        | 1                      | ENSMICT000100053941.2        | Chromosome 20                         | 17,188,391-17,206,499   | Yes             | Reverse          | Yes                    | Forward                                                                                                                                                                                    |                                                                                                                                     |
| Otolemur garnettii         | Garnett's Galago             | Primate      | Galagidae      | Ensembl 107       | No                                                  | NA                        | 1                      | ENSOGAT000100025787.1        | Scaffold GL873593.1                   | 3,059,738-3,080,850     | Yes             | Reverse          | Yes                    | Forward                                                                                                                                                                                    |                                                                                                                                     |
| Homo sapiens               | Human                        | Primate      | Hominidae      | Ensembl 107       | No                                                  | NA                        | 0                      | NA                           | Chromosome 8                          | 27,560,272-27,560,378   | No              | Forward          | Yes                    | Reverse                                                                                                                                                                                    |                                                                                                                                     |
| Propithecus coquereli      | Coquerel's Sifaka            | Primate      | Indridae       | Ensembl 107       | No                                                  | NA                        | 1                      | ENSPCOT000100027847.1        | Scaffold K0018065.1                   | 8,255,372-8,271,581     | Yes             | Forward          | Yes                    | Reverse                                                                                                                                                                                    |                                                                                                                                     |
| Cavia aperea               | Brazilian Guinea Pig         | Rodent       | Caviidae       | Ensembl 107       | No                                                  | NA                        | 1                      | ENSCAPT000100007155.1        | AVP201000112                          | 63,458,181-63,472,619   | Likely          | Forward          | Yes                    | Reverse                                                                                                                                                                                    |                                                                                                                                     |
| Cavia porcellus            | Domestic Guinea Pig          | Rodent       | Caviidae       | Ensembl 107       | Yes, Ensembl, Cavia aperea                          | Yes                       | 0                      | NA                           | D5562856.1                            | 63,491,696-63,506,078   | No              | Forward          | Yes                    | Reverse                                                                                                                                                                                    | Recovered exons from Cavia aperea GULO transcript                                                                                   |
| Chinchilla lanigera        | Chinchilla                   | Rodent       | Chinchillidae  | Ensembl 107       | No                                                  | NA                        | 2                      | ENSLAT000100021123.1         | Scaffold JH721863.1                   | 50,132,178-50,154,632   | Yes             | Forward          | Yes                    | Reverse                                                                                                                                                                                    |                                                                                                                                     |
| Mesocricetus auratus       | Golden Hamster               | Rodent       | Cricetidae     | Ensembl 107       | No                                                  | NA                        | 1                      | ENSMAUT0000017046.1          | Scaffold X8708180.1                   | 2,434,830-2,454,258     | Yes             | Forward          | Yes                    | Reverse                                                                                                                                                                                    |                                                                                                                                     |
| Meriones unguiculatus      | Mongolian Gerbil             | Rodent       | Muridae        | Ensembl 107       | No                                                  | NA                        | 2                      | Primary_assembly NH101000032 | 1,397,210-1,415,754                   | Yes                     | Reverse         | Yes              | Forward                |                                                                                                                                                                                            |                                                                                                                                     |
| Mus musculus               | Mouse (C57Bl/6j)             | Rodent       | Muridae        | Ensembl 107       | No                                                  | NA                        | 1                      | ENSMUST000100059970.9        | Chromosome 14                         | 66,224,235-66,245,856   | Yes             | Reverse          | Yes                    | Forward                                                                                                                                                                                    |                                                                                                                                     |
| Rattus norvegicus          | Rat                          | Rodent       | Muridae        | Ensembl 107       | No                                                  | NA                        | 1                      | ENSRNOT000100022702.7        | Primary assembly 15                   | 40,205,665-40,227,874   | Yes             | Reverse          | Yes                    | Forward                                                                                                                                                                                    |                                                                                                                                     |
| Ictidomys tridecemlineatus | Striped Gopher               | Rodent       | Sciuridae      | Ensembl 107       | No                                                  | NA                        | 1                      | Scaffold JH393485.1          | 470,978,492,441                       | Yes                     | Forward         | Yes              | Reverse                |                                                                                                                                                                                            |                                                                                                                                     |
